1 Short title: Pesticide effects on trematodes

2

3

4 **Effect of agrochemical exposure on *Schistosoma mansoni* cercariae survival and activity**

5

6 Devin K. Jones<sup>1†\*</sup>, David D. Davila<sup>2†</sup>, Karena H. Nguyen<sup>3</sup>, Jason R. Rohr<sup>1</sup>

7 1) University of Notre Dame, Department of Biological Sciences, Notre Dame, IN, USA

8

46556

9 2) University of Miami, College of Arts and Sciences, Coral Gables, FL, USA 33146

10 3) University of South Florida, Department of Integrative Biology, Tampa, FL, USA 33620

11

12

13

14 † Both authors contributed equally to this manuscript

15 \*Corresponding author

16

17 Author contact:

18 Devin K. Jones

19 University of Notre Dame

20 Department of Biological Sciences

21 100 Galvin Life Science Center

22 Notre Dame, IN 46556

23 [devin.k.jones@gmail.com](mailto:devin.k.jones@gmail.com)

24

25  
26  
27  
28  
29  
30  
31  
32  
33  
34  
35  
36  
37  
38  
39  
40  
41  
42  
43  
44  
45  
46

## Abstract

Land conversion and agrochemical use has altered freshwater systems worldwide, introducing chemicals and pathogens (e.g., helminths) that threaten human health. In developing countries where stringent pesticide use and water treatment is limited, understanding how contaminants and pathogens interact is of particular importance. Schistosomiasis, a neglected tropical disease, is caused by the free-swimming cercariae of *Schistosoma mansoni*, a flatworm (trematode) that is transmitted from snails to humans. Schistosomiasis afflicts over 200 million people, reinforces poverty, and has an enormous impact on children. To investigate the effects of pesticide exposure on *S. mansoni*, we exposed cercariae to four insecticides (cypermethrin, deltamethrin, dimethoate, and methamidophos) at five concentrations above estimated environmental concentrations, and recorded survival and activity during a 24-hr time-to-death assay. To identify live, but paralyzed, cercariae from dead cercariae, we used Trypan blue dye, which is only expelled from live cells. We found no effect of cypermethrin, deltamethrin, or dimethoate exposure on the survival and activity of *S. mansoni* cercariae. Surprisingly, methamidophos exposure decreased activity and increased survival of cercariae compared to those in control treatments. This result is likely due to methamidophos causing paralysis of cercariae, which reduced energy consumption lengthening lifespan. Although methamidophos exposure increased survival time, the pesticide-induced paralysis left cercariae functionally dead, which could influence overall disease prevalence and thus human health. Future studies that examine the influence of agrochemicals on waterborne disease prevalence and transmission need to consider both the lethal and sublethal effects of exposure to fully understand the complexity of host-parasite interactions.

47 *Author Summary:* Previous methods used to investigate the effects of pesticide exposure on free-  
48 swimming life stages of trematode pathogens include 1) normal activity, 2) movement following  
49 stimuli, or 3) staining dyes. As pesticides commonly target motor function, the use of an  
50 individual metric to assign trematode survival might misidentify pesticide-induced paralysis as  
51 mortality, therefore underestimating trematode tolerance. In this study, we used activity assays in  
52 tandem with Trypan blue staining dye to assess the effects of four pesticides on *Schistosoma*  
53 *mansoni* cercariae. We found that cercariae are highly tolerant to pesticide levels far beyond  
54 environmentally relevant concentrations. Surprisingly, exposure to methamidophos increased the  
55 survival and decreased the activity of cercariae compared to those in control treatments. Reduced  
56 activity was presumably caused by methamidophos-induced paralysis of cercariae. Although we  
57 observed increased survival following methamidophos exposure, the pesticide-induced paralysis  
58 rendered cercariae functionally dead. Our results highlight the need for future assays examining  
59 trematode tolerance to contaminants to employ both activity assays and staining dye to discern  
60 cercarial paralysis from mortality. Understanding the effects of pesticide exposure on disease  
61 transmission is of vital importance as pesticide use and agricultural activities intensify in  
62 developing nations endemic to waterborne pathogens.

63

64

65

66

## 1. Introduction

67           The rate of production and use of synthetic chemicals, such as pesticides, has outpaced  
68 other human drivers of global environmental change (1), which has resulted in the contamination  
69 of ecosystems worldwide (2-4). Exposure to pesticides can cause direct, lethal effects on  
70 sensitive species or sublethal effects on an organism's behavior, physiology, and/or morphology  
71 (5-10). Organophosphate and pyrethroid insecticides, for example, target important esterases and  
72 nerve cell gates leading to ionic imbalances and uncontrollable convulsions and tremors before  
73 paralysis and eventual death (11, 12). Given that pesticide production and trade is estimated to  
74 increase drastically by 2050 (13, 14), there is a growing need to understand how agrochemical  
75 contamination impacts human and wildlife health.

76           Freshwater ecosystems, which are vital for global economies, societal well-being, and  
77 maintaining human health (15-17), are threatened by agricultural activities and agrochemical use  
78 (4, 18, 19). For instance, over 40% of the global land area is at risk of producing insecticide  
79 runoff to lotic systems (19). This same agricultural runoff can also carry microorganisms  
80 including bacterial, viral, fungal, and helminth pathogens that cause waterborne diseases, further  
81 jeopardizing human health (20, 21). In developing countries, such as those in sub-Saharan  
82 Africa, increased land conversion for agriculture (13, 22) combined with water management and  
83 development for irrigation (23, 24) has led to an increase in human exposure to agrochemicals  
84 and waterborne pathogens (25-27). Understanding the effects of agrochemical contamination on  
85 waterborne diseases is vital as the density of human settlements near managed water systems and  
86 the demand for agricultural output are increasing (14, 23, 28).

87           Schistosomiasis is one example of a waterborne, neglected tropical disease that is  
88 affected by agriculture. Schistosomiasis afflicts over 200 million people, of which over 90%

89 reside in sub-Saharan Africa (29, 30), and is caused by parasitic *Schistosoma* trematodes. Free-  
90 swimming *Schistosoma* cercariae are released from intermediate snail hosts and penetrate the  
91 skin of definitive human hosts while in the water. *Schistosoma* eggs, produced by matured  
92 worms, leave the human host via feces or urine, and hatch in aquatic environments where the  
93 next free-living stage, miracidia, penetrate the snail intermediate host to complete the life cycle.  
94 Cercariae and miracidia are short-lived organisms, generally only having enough reserves to live  
95 for approximately 24 hours (31). In an outdoor mesocosm experiment, populations of  
96 intermediate snail hosts were shown to increase following bottom-up and top-down indirect  
97 effects caused by herbicide and insecticide exposure, respectively (32). Thus, human infection  
98 risk was predicted to increase following pesticide contamination of aquatic systems. As pesticide  
99 runoff potential is high in developing African nations where schistosomiasis is prevalent (19, 29,  
100 33), investigating the direct effects pesticide exposure has on the aquatic life stages of  
101 *Schistosoma* is of great importance.

102 *Schistosoma* miracidia and cercariae might be sensitive to environmental contaminants  
103 given their occurrence in freshwater environments during transition between intermediate and  
104 definitive hosts (34). Surprisingly, previous studies have not reported significant lethal effects of  
105 pesticide exposure on either life stage of *Schistosoma* (32). In contrast, similar trematode species  
106 found in North American snails are known to be sensitive as cercariae to the commonly applied  
107 herbicides atrazine (35, 36) and glyphosate (37), as well as organophosphate, pyrethroid, and  
108 neonicotinoid insecticides (38). Interestingly, the method of assigning cercarial survival differed  
109 among these studies. Survival can be assessed with 1) general swimming or climbing movement  
110 (36), 2) movement following stimuli (35, 38-40), or 3) Trypan blue staining (32). Complicating  
111 the use of either activity or dyes to examine effects of pesticide exposure is that many

112 insecticides cause paralysis; thus, paralyzed cercariae cannot respond to stimuli but can excrete  
113 Trypan blue, which is absorbed by dead cells and excreted by living cells (41, 42). If exposure to  
114 insecticides that target the nervous system reduce activity or cause paralysis, this should reduce  
115 energy consumption of short-lived, free-living, aquatic organisms, such as cercariae, potentially  
116 extending their lifespan despite the fact that they are not functional and therefore not infective.  
117 This could explain some of the variability in cercarial responses to insecticides.

118 To assess this hypothesis, we exposed *Schistosoma* cercariae to five different  
119 concentrations of four insecticides from two different pesticide classes (organophosphate,  
120 pyrethroid) using a 24-hr time-to-death (TTD) assay. We focused on organophosphate and  
121 pyrethroid insecticides because they are nerve agents that can disrupt muscle activity and thus  
122 movement. To distinguish among active cercariae, paralyzed cercariae, and dead cercariae, we  
123 simultaneously employed activity assays and Trypan blue staining (S1 Fig). We predicted that  
124 cercarial exposure to the insecticides would cause paralysis, thus reducing activity and extending  
125 survival compared to cercariae not exposed to insecticides that were actively swimming. We also  
126 predicted similar effects on cercarial activity regardless of organophosphate or pyrethroid  
127 exposure given the need for both acetylcholine esterase (organophosphate target) and voltage-  
128 gated ion channel (pyrethroid target) function in *Schistosoma* cercarial movement (43, 44).

## 129 **2. Methods & Materials**

### 130 *2.1 Pesticide background*

131 We chose four insecticides commonly used and detected in sub-Saharan African  
132 countries (27, 45, 46). Dimethoate (CAS 60-51-5) and methamidophos (CAS 10265-92-6) are  
133 broad-spectrum organophosphate insecticides that are acetylcholinesterase (AChE) inhibitors  
134 used to protect crops such as grapes, tobacco, and potatoes. Deltamethrin (CAS 52918-63-5) and

135 cypermethrin (CAS 52315-07-8) are Type-II pyrethroid insecticides that mimic natural  
136 pyrethrins by interfering with sodium ion channels of nerve cells. Deltamethrin and cypermethrin  
137 are applied to numerous agricultural crops, such as corn, cotton, and rice, and play a vital role in  
138 integrated pest management strategies to reduce vector populations. Although estimated use  
139 records of each pesticide are scarce for African countries, their use is listed by the Pesticide  
140 Action Network Africa (<http://www.pan-afrique.org/departen.php>). Moreover, previous research  
141 has reported human exposure to each pesticide, and has found residues of each in the air, water,  
142 soil, and produce of African countries (46-49).

## 143 2.2 Study organisms

144 *Schistosoma mansoni*, the trematode species responsible for intestinal schistosomiasis, is  
145 found within aquatic environments in South America, the Caribbean, and Africa. In Sub-Saharan  
146 Africa, the increased management of waterways and construction of dams and irrigation  
147 channels has contributed to the increased abundance and distribution of intermediate snail hosts,  
148 increasing human risk of exposure to schistosomiasis (23, 24, 33).

149 We obtained 50 infected *Biomphalaria glabrata* snails on September 11, 2018 that were  
150 exposed to *S. mansoni* (NMRI strain) on September 5, 2018 from the NIAID Schistosomiasis  
151 Resource Center of the Biomedical Research Institute (Rockville, MD). Snails were held  
152 individually in 200-mL containers filled with 200 mL HHCOMBO water (Baer et al 1999) and  
153 fed *ad libitum* a ration of ground fish flakes (Tetramin®; Blacksburg, VA, USA) and spirulina  
154 (NOW FOODS®; Bloomingdale, IL, USA) suspended in agar (Fisher BioReagents®; Fair Lawn,  
155 NJ, USA). Snails were held under laboratory conditions (25.5°C, 12:12 light:dark), and full  
156 water exchanges were conducted biweekly.

## 157 2.3 Time-to-death assay design

158 We examined the effects of the four pesticides on the survival and behavior of free-  
159 swimming cercariae of *S. mansoni* using a 24-hr time-to-death (TTD) assay. We conducted the  
160 TTD assay using 24-well tissue culture plates (Falcon® # 353047; Corning Incorporated,  
161 Corning, NY, USA). We tested five concentrations of each insecticide for a total of 20 pesticide  
162 treatments. To these treatments, we added a water control and an ethanol vehicle control. A  
163 vehicle control was included in the experimental design because pyrethroid insecticides are  
164 insoluble in water. We included two replicates of each control treatment and one replicate of  
165 each pesticide treatment on each 24-well plate and used five plates for a total of 120 wells.

166 To obtain *Schistosoma* cercariae, eight infected snails were transferred to 50-mL glass  
167 beakers filled with 15 mL of oxygenated HHCOMBO water and were held under direct artificial  
168 light for 1.5 hr. Snails were then returned to their respective husbandry containers, the 15-mL  
169 HHCOMBO solutions containing shed cercariae were homogenized, and we dispensed 250  $\mu$ L  
170 cercariae slurry to each well. On average, this resulted in  $5.05 \pm 0.43$  (mean  $\pm$  1 SE) cercariae  
171 per well.

172 We created our pesticide treatments by first making stock solutions of each chemical.  
173 Organophosphate insecticides were dissolved directly in HHCOMBO water (5 mg/mL), whereas  
174 pyrethroid insecticides were dissolved using ethanol (0.05 mg a.i./mL). We then added an aliquot  
175 of each stock solution to 10 mL of HHCOMBO water to create an intermediate solution for each  
176 targeted concentration (20 intermediate solutions). Prior to addition of stock solutions, we  
177 removed the same volume of HHCOMBO water from the 10-mL intermediate vial that we would  
178 be adding to correct for total volume. We added 100  $\mu$ L of each intermediate solution to their  
179 respective wells to obtain the nominal concentrations of 10, 30, 50, 70, and 100  $\mu$ g/L for  
180 pyrethroids and 100, 200, 300, 400, 500 mg/L for organophosphates. Although the chosen



181 nominal pesticide concentrations fall above expected environmental concentrations (Table 1),  
182 they were selected following a series of pilot studies with the aim of causing increased cercariae  
183 mortality. We attempted to narrow our range of concentrations for each class using pilot studies  
184 that employed 0.1, 0.5, 1.0, 2.0, and 10.0 µg active ingredient/L for pyrethroids and 5, 10, 35, 75,  
185 and 100 mg active ingredient/L for organophosphates. However, we did not observe significant  
186 death at these lower concentrations when compared to the water control. Thus, concentrations  
187 were increased for both pesticide classes in the final experiment. The ethanol vehicle control was  
188 created by adding 101 µL of ethanol (95%) to 9.899 mL of HHCOMBO water to match the  
189 ethanol concentration in the highest volume of pyrethroid stock solution being transferred to the  
190 intermediate solution. To create our water controls, we instead added 100 µL of HHCOMBO  
191 water to each respective well. We then added 15 µL Corning™ Trypan blue dye (CAT  
192 MT25900CI, Fisher Scientific) to each well for cercarial staining. We conducted a 24-hr TTD  
193 assay to compare survival of cercariae exposed to Trypan blue stain to that of cercariae in water  
194 controls and found no effect of staining on survival ( $p = 0.44$ ). Lastly, we added 135 µL of  
195 HHCOMBO water to each well to bring the total volume to 500 µL.

196 We assessed survival and activity of cercariae during the 24-hr toxicity test. We counted  
197 the number of unstained (alive), stained (dead), and active cercariae every two hr for the first 12  
198 hr, and then every six hr for the second 12 hr. Activity was recorded if cercariae were actively  
199 swimming, crawling, or moving in the water column. We did not conduct water exchanges or  
200 renew pesticide concentrations during the 24-hr exposure period. After 24 hr, we added 20 µL  
201 Lugol's iodine solution to each well to euthanize and stain surviving cercariae. Lugol's iodine  
202 solution was used to determine the total number of cercariae per well as we used a standardized  
203 volume of shed cercariae in favor of separating individuals to reduce handling time of cercariae.

## 204 2.5 Statistical analysis

205 To examine the direct toxic effects of the four insecticides on *S. mansoni* cercariae, we  
206 analyzed cercarial survival over time using Cox's proportional hazard models (50). We first  
207 conducted an analysis comparing survival of cercariae exposed to the ethanol vehicle control and  
208 the water control to assess any effect of the vehicle. We did not find any difference between the  
209 two treatments ( $p = 0.94$ ; S1 Table). We thus pooled the ethanol vehicle and water controls for  
210 all subsequent survival analyses. We then conducted four independent survival analyses, one for  
211 each insecticide, to examine the effect of concentration (continuous variable) on cercarial  
212 survival. The pooled control treatment served as a 0.0  $\mu\text{g/L}$  concentration in each model.  
213 Following a significant effect of concentration, we then compared the survival of cercariae in  
214 each insecticide concentration (categorical variable) to the survival of cercariae in the pooled  
215 control treatment. We included 'experimental well' as a random effect in each model. Cox's  
216 proportional hazards model were employed using RStudio Version 1.1.453 (51) and the *survival*  
217 and *coxme* packages. Additionally, we used the *drc* package in RStudio to estimate the effective  
218 dose (ED10, ED50, and ED90) for pesticides that induced significant concentration effects on  
219 cercarial survival. We first used the *drm* function to examine the effect of  $\log_{10}$ -transformed  
220 methamidophos concentration (+ 1) on the occurrence of cercarial death, and then back-  
221 calculated estimated effective doses ( $10^X - 1$ ).

222 To test whether cercarial activity over time was affected by insecticide exposure, we  
223 employed generalized linear mixed-effects (GLME) models. We first examined if activity over  
224 time differed between cercariae exposed to the water and ethanol vehicle controls. We examined  
225 if the interactive effects of control treatment and time (independent variables) influenced the  
226 activity of cercariae, represented by the binomial response of the number of active and inactive

227 cercariae within each experimental well. We found no difference in the activity of cercariae in  
228 the two control treatments ( $\chi^2_{(1)} = 1.97, p = 0.161$ ), so we pooled the water and ethanol vehicle  
229 controls. For each insecticide, we then investigated the interactive effects of concentration  
230 (continuous) and time (independent variables) on cercarial activity. If we observed a significant  
231 effect of concentration, we then conducted a subsequent model that investigated the main and  
232 interactive effects of pesticide concentration (categorical) and time on the activity of cercariae  
233 and conducted Tukey's post-hoc pairwise comparisons. We included 'experimental well' as a  
234 random effect term within each model. Model analyses were conducted using RStudio and the  
235 *car*, *lme4*, and *multcomp* packages.

### 236 **3. Results**

#### 237 *3.1 Time-to-death assays*

238 Cox's proportional hazard models revealed that there was no effect of concentration on  
239 the survival of cercariae exposed to cypermethrin, deltamethrin, or dimethoate ( $p \geq 0.64$ ; S1  
240 Table, S1 Dataset). In contrast, we did find a significant effect of methamidophos concentration  
241 on cercarial survival ( $b = -0.003, p = 0.002$ ). Exposure to 100, 200, 300, and 400 mg/L  
242 methamidophos increased cercarial survival relative to the pooled controls ( $p \leq 0.031$ ; Fig 1, S1  
243 Table). Survival of cercariae exposed to 500 mg/L methamidophos did not differ from survival  
244 of cercariae in the pooled controls ( $p = 0.12$ ). After 24-hr of exposure, survival of cercariae in the  
245 pooled control was 41.3% compared to >73% for cercariae exposed to any methamidophos  
246 concentration.

247

248 **Fig 1. Survival of *S. mansoni* cercariae following exposure to one of six methamidophos**

249 **concentrations.** Cercariae were exposed to 0, 100, 200, 300, 400, or 500 mg/L methamidophos

250 for 24 hr using a time-to-death assay. The pooled control treatment represents the combined  
251 survival of cercariae in the water and vehicle control treatments ( $p = 0.94$ ).

252

253 To examine the toxicity of methamidophos to *S. mansoni* cercariae, we calculated the 24-  
254 hr effective dose. The slope (b;  $p = 0.4517$ ) and LD50 (e;  $p = 0.4380$ ) parameter estimates from  
255 the two-parameter log-logistic model with fixed lower and upper limits were not different from  
256 zero. The estimated 24-hr 10, 50, and 90% effective doses ( $\pm$  SE) for methamidophos were 0.61  
257 ( $\pm 3.68$ ), 7.06 ( $\pm 13.75$ ), and 9770.92 mg/L ( $\pm 628.13$ ), respectively.

### 258 3.2 Activity assay

259 To examine the influence of insecticide exposure on cercarial activity, we used  
260 generalized linear mixed-effects models. While we did not find an effect of concentration ( $p \geq$   
261 0.149) or a concentration-by-time interaction ( $p \geq 0.366$ ) for dimethoate, cypermethrin, or  
262 deltamethrin, activity declined with time for all three insecticides ( $p < 0.001$ ). For  
263 methamidophos, concentration ( $\chi^2_{(1)} = 37.48, p < 0.001$ ) and time ( $\chi^2_{(1)} = 46.40, p < 0.001$ ), but  
264 not their interaction ( $\chi^2_{(1)} = 0.534, p = 0.4649$ ), influenced cercarial activity (Fig 2, S2 Dataset).  
265 Post-hoc multiple comparison tests (Tukey) revealed that mean activity of cercariae exposed to  
266 300, 400, and 500 mg/L methamidophos was lower than the activity in the pooled controls ( $p \leq$   
267 0.047; Fig 2A). Activity of cercariae exposed to 100 and 200 mg/L methamidophos did not differ  
268 from that in the pooled controls ( $p \geq 0.076$ ). Excluding the 0 mg/L control, activity of cercariae  
269 did not differ among methamidophos concentrations ( $p \geq 0.071$ ). Mean cercarial activity  
270 declined over time (Fig 2B).

271

272 **Fig 2. Mean cercarial activity (%) of *S. mansoni* following exposure to one of six**  
273 **methamidophos concentrations.** We recorded the number of cercariae active over 24 hrs  
274 following exposure to 0, 100, 200, 300, 400, or 500 mg/L methamidophos. We calculated  
275 cercarial activity (%) by dividing the number of trematodes observed moving by the total number  
276 of individuals in each respective well. We observed the main effect of methamidophos  
277 concentration (A) and time (B) on cercarial activity. Data points represents overall treatment  
278 mean values  $\pm$  1 SE.

279

280

#### 4. Discussion

281 In the current study, we sought to understand how free-swimming *Schistosoma* cercariae  
282 respond to four insecticides from two chemical classes commonly used in agricultural practices  
283 in developing regions endemic to schistosomiasis. We found no significant effect of exposure to  
284 cypermethrin, deltamethrin, and dimethoate on the survival and activity of *S. mansoni* cercariae  
285 over 24 hr. Surprisingly, exposure to methamidophos resulted in increased cercarial survival  
286 compared to the pooled control treatments. Moreover, the use of activity assays in combination  
287 with Trypan blue staining allowed us to observe that this increased survival appeared to be  
288 caused by the reduced activity of cercariae exposed to methamidophos, which extended their life.

289 Understanding the influence of common-use pesticides on waterborne diseases is vital to  
290 protecting human health in developing regions. Our results suggest that cercariae are highly  
291 tolerant to the direct toxic effects of cypermethrin, deltamethrin, dimethoate, and methamidophos  
292 contamination. Given that the concentrations of insecticides reported in samples from developing  
293 regions all fall below concentrations used in the current study (46, 47, 52-54), it is unlikely that  
294 *Schistosoma* cercariae suffer direct mortality from pesticide exposure. Previous research has also

295 reported no influence of chlorpyrifos (organophosphate) or atrazine (triazine) exposure at  
296 environmentally relevant concentrations on *S. mansoni* survival over 12 hr (32). While the  
297 indirect effects of agrochemicals have been shown to potentially propagate schistosomiasis (32),  
298 the results of this study suggest that, due to substantial cercarial tolerance, direct toxicity of  
299 pesticides is not an apparent counteractive or mitigating factor for disease risk. As it is unlikely  
300 that cercariae in surface waters of natural systems are exposed to only a single chemical  
301 compound at a time, future research should investigate the effects of pesticide mixtures on  
302 cercarial longevity and infectivity (8). Moreover, investigation into the direct toxic effects of  
303 other pesticide classes, such as organochlorines, will be useful as older, more toxic pesticides are  
304 still used in developing regions due to availability and low cost (55).

305       Exposure to pesticides can also cause sublethal changes in behavior and physiology that  
306 can alter metabolic processes and energy use. We observed decreased activity of *S. mansoni*  
307 cercariae exposed to methamidophos, which was likely caused by full or partial paralysis. The  
308 life span (24-48 hr) of *S. mansoni* cercariae is dependent on finite glycogen and fat reserves, and  
309 we hypothesize that the paralyzed cercariae might have prolonged longevity because of lower  
310 rates of energy consumption (56, 57). Indeed, we observed reduced cercarial activity among  
311 individuals exposed to methamidophos relative to the activity of cercariae in all other treatments.  
312 Other pesticides and naturally occurring chemicals have also been reported to reduce mobility of  
313 nematodes and trematodes, including *S. mansoni* (36, 58, 59). We believe that the exposure to  
314 methamidophos caused a true paralytic effect through acetylcholinesterase inhibition in affected  
315 individuals, as past research has shown certain cholinergic agents exert an inhibitory effect on  
316 muscular activity of *S. mansoni* and other parasites (60, 61).

317           Although methamidophos-exposed cercariae lived longer than cercariae in the pooled  
318 controls, they were “functionally dead” as their immobility prevents them from searching for and  
319 infecting definitive hosts (59). Therefore, the methamidophos-induced paralysis could reduce  
320 disease transmission and negative impacts on humans. Infection assays in the future should seek  
321 to confirm whether cercarial paralysis observed in this study provides protection to human hosts  
322 (59). Lastly, the methamidophos-induced paralysis may be strain-, species-, and life stage-  
323 specific, providing many questions for future researchers including the comparison of tolerance  
324 between lab-reared and field-collected *Schistosoma* cercariae, and if tolerance varies among free-  
325 swimming cercariae or miracidia and encysted individuals.

326           The combined use of Trypan blue staining and activity assays employed in the current  
327 study not only allowed us to discriminate whether cercariae were active versus inactive, but also  
328 whether they were paralyzed versus truly dead. This could have implications for the  
329 interpretation of previous toxicological assays of free-swimming trematode life stages. For  
330 instance, previous research using activity to assign mortality to paralyzed cercariae might  
331 underestimate the actual tolerance of trematodes to pesticide concentrations (35). Moreover, if  
332 the effects of pesticide exposure are short-lived and reversible, either through host metabolism,  
333 environmental breakdown, or clearance by flowing water, we may overestimate the toxicological  
334 effects of pesticides on disease transmission (32). In natural systems, it is possible that the  
335 continuous daily release of thousands of cercariae by infected snail hosts (62) will minimize the  
336 influence of pesticide-induced cercarial paralysis on disease dynamics. Alternatively, if pesticide  
337 exposure overlaps with peak hours of cercarial shedding, pesticide-induced paralysis might  
338 reduce overall infection risk. Future research that examines the complex relationship among  
339 infected snail hosts, timing of pesticide exposure, and environmental conditions (e.g., flow,

340 temperature) will reveal how each contributes to the prevalence and transmission dynamics of  
341 schistosomiasis (*sensu* (32)).

342 Freshwater systems are increasingly threatened by numerous anthropogenic activities (3,  
343 17, 23). Understanding the effects of contaminants on waterborne disease is of utmost  
344 importance in developing nations where water scarcity and increased agricultural activity might  
345 threaten human health (14). Given the increased risk of agricultural runoff in these nations (19),  
346 it will be important for future studies to investigate the acute lethal and chronic sublethal effects  
347 of contaminants on waterborne pathogens to more thoroughly understand their effects on disease  
348 dynamics.

## 349 **5. Acknowledgements**

350 The authors would like to thank Caleb Castro, Karlee Gionet, and Amber Carey for their  
351 assistance with snail husbandry and experimental work, and Dr. Samantha Rumschlag for her  
352 assistance with statistical analyses and web tool calculations. The University of South Florida's  
353 Leadership Alliance Fellowship awarded to DD enabled this research. *B. glabrata* snails  
354 provided by the NIAID Schistosomiasis Resource Center of the Biomedical Research Institute  
355 (Rockville, MD) through NIH-NIAID Contract HHSN272201700014I for distribution through  
356 BEI Resources. Funds were provided by grants to J.R.R. from the National Science Foundation  
357 (EF-1241889, DEB-1518681, IOS-1754868) and the National Institutes of Health  
358 (R01TW010286-01).

359  
360 *Author contributions:* JRR, DDD, and DKJ conceived the experimental ideas; DDD, DKJ, and  
361 KHN designed the methodology; DDD, DKJ, and KHN collected the data; JRR and DKJ



362 analyzed the data; DKJ and DDD led the writing on the manuscript. All authors contributed  
363 critically to the drafts and gave final approval for publication.

364

## 365 References

- 366 1. Bernhardt ES, Rosi EJ, Gessner MO. Synthetic chemicals as agents of global change.  
367 *Frontiers in Ecology and the Environment*. 2017;15(2):84-90.
- 368 2. Stone WW, Gilliom RJ, Ryberg KR. Pesticides in U.S. Streams and Rivers: Occurrence and  
369 Trends during 1992-2011. *Environmental Science & Technology*. 2014;48(19):11025-30.
- 370 3. Stehle S, Schulz R. Agricultural insecticides threaten surface waters at the global scale. *P*  
371 *Natl Acad Sci USA*. 2015;112(18):5750-5.
- 372 4. Vorosmarty CJ, McIntyre PB, Gessner MO, Dudgeon D, Prusevich A, Green P, et al. Global  
373 threats to human water security and river biodiversity. *Nature*. 2010;467(7315):555-61.
- 374 5. Fleeger JW, Carman KR, Nisbet RM. Indirect effects of contaminants in aquatic  
375 ecosystems. *Sci Total Environ*. 2003;317(1-3):207-33.
- 376 6. Relyea R, Hoverman J. Assessing the ecology in ecotoxicology: a review and synthesis in  
377 freshwater systems. *Ecol Lett*. 2006;9(10):1157-71.
- 378 7. Kohler HR, Triebkorn R. Wildlife Ecotoxicology of Pesticides: Can We Track Effects to  
379 the Population Level and Beyond? *Science*. 2013;341(6147):759-65.
- 380 8. Halstead NT, McMahon TA, Johnson SA, Raffel TR, Romansic JM, Crumrine PW, et al.  
381 Community ecology theory predicts the effects of agrochemical mixtures on aquatic  
382 biodiversity and ecosystem properties. *Ecology Letters*. 2014;17(8):932-41.
- 383 9. Rohr JR, Kerby JL, Sih A. Community ecology as a framework for predicting contaminant  
384 effects. *Trends Ecol Evol*. 2006;21(11):606-13.
- 385 10. Clements WH, Rohr JR. Community responses to contaminants: using basic ecological  
386 principles to predict ecotoxicological effects. *Environ Toxicol Chem*. 2009;28(9):1789-800.
- 387 11. Sanchez-Bayo F. Insecticides mode of action in relation to their toxicity to non-target  
388 organisms. *Journal of Environmental & Analytical Toxicology*. 2012.
- 389 12. Antwi FB, Reddy GVP. Toxicological effects of pyrethroids on non-target aquatic insects.  
390 *Environ Toxicol Phar*. 2015;40(3):915-23.
- 391 13. Tilman D, Fargione J, Wolff B, D'Antonio C, Dobson A, Howarth R, et al. Forecasting  
392 agriculturally driven global environmental change. *Science*. 2001;292(5515):281-4.
- 393 14. Rohr JR, Barrett CB, Civitello DJ, Craft ME, Delius B, DeLeo GA, et al. Emerging human  
394 infectious diseases and the links to global food production. *Nature Sustainability*.  
395 2019;2(6):445.
- 396 15. Baron JS, Poff NL, Angermeier PL, Dahm CN, Gleick PH, Hairston NG, et al. Meeting  
397 ecological and societal needs for freshwater. *Ecol Appl*. 2002;12(5):1247-60.
- 398 16. Costanza R, de Groot R, Sutton P, van der Ploeg S, Anderson SJ, Kubiszewski I, et al.  
399 Changes in the global value of ecosystem services. *Global Environ Chang*. 2014;26:152-8.
- 400 17. Strayer DL, Dudgeon D. Freshwater biodiversity conservation: recent progress and future  
401 challenges. *J N Am Benthol Soc*. 2010;29(1):344-58.
- 402 18. Malaj E, von der Ohe PC, Grote M, Kuhne R, Mondy CP, Usseglio-Polatera P, et al.  
403 Organic chemicals jeopardize the health of freshwater ecosystems on the continental scale. *P*  
404 *Natl Acad Sci USA*. 2014;111(26):9549-54.
- 405 19. Ippolito A, Kattwinkel M, Rasmussen JJ, Schafer RB, Fornaroli R, Liess M. Modeling  
406 global distribution of agricultural insecticides in surface waters. *Environ Pollut*.  
407 2015;198:54-60.
- 408 20. Rizak S, Hrudehy SE. Drinking-water safety - challenges for community-managed systems.  
409 *Journal of Water and Health*. 2008;6:33-41.

- 410 21. Patz JA, Graczyk TK, Geller N, Vittor AY. Effects of environmental change on emerging  
411 parasitic diseases. *International Journal for Parasitology*. 2000;30(12-13):1395-405.
- 412 22. Alexandratos N, Bruinsma J. World agriculture towards 2030/2050: the 2012 revision. ESA  
413 Working paper FAO, Rome; 2012.
- 414 23. Steinmann P, Keiser J, Bos R, Tanner M, Utzinger J. Schistosomiasis and water resources  
415 development: systematic review, meta-analysis, and estimates of people at risk. *Lancet*  
416 *Infect Dis*. 2006;6(7):411-25.
- 417 24. Sokolow SH, Jones IJ, Jocque M, La D, Cords O, Knight A, et al. Nearly 400 million people  
418 are at higher risk of schistosomiasis because dams block the migration of snail-eating river  
419 prawns. *Philos T R Soc B*. 2017;372(1722).
- 420 25. Southgate VR. Schistosomiasis in the Senegal river basin: Before and after the construction  
421 of the dams at Diama, Senegal and Manantali, Mali and future prospects. *J Helminthol*.  
422 1997;71(2):125-32.
- 423 26. Lapworth DJ, Nkhuwa DCW, Okotto-Okotto J, Pedley S, Stuart ME, Tijani MN, et al.  
424 Urban groundwater quality in sub-Saharan Africa: current status and implications for water  
425 security and public health. *Hydrogeol J*. 2017;25(4):1093-116.
- 426 27. Jepson PC, Guzy M, Blaustein K, Sow M, Sarr M, Mineau P, et al. Measuring pesticide  
427 ecological and health risks in West African agriculture to establish an enabling environment  
428 for sustainable intensification. *Philos Trans R Soc Lond B Biol Sci*.  
429 2014;369(1639):20130491.
- 430 28. Lambin EF, Geist HJ, Lepers E. Dynamics of land-use and land-cover change in tropical  
431 regions. *Annu Rev Env Resour*. 2003;28:205-41.
- 432 29. WHO. Working to overcome the global impact of neglected tropical diseases: first WHO  
433 report on neglected tropical diseases. Geneva: World Health Organization, Organization  
434 WH; 2010.
- 435 30. Fenwick A. The global burden of neglected tropical diseases. *Public Health*.  
436 2012;126(3):233-6.
- 437 31. Olivier LJ. Infectivity of *Schistosoma Mansoni* Cercariae. *American Journal of Tropical*  
438 *Medicine and Hygiene*. 1966;15(6p1):882-&.
- 439 32. Halstead NT, Hoover CM, Arakala A, Civitello DJ, De Leo GA, Gambhir M, et al.  
440 Agrochemicals increase risk of human schistosomiasis by supporting higher densities of  
441 intermediate hosts. *Nature Communications*. 2018;9.
- 442 33. Stensgaard AS, Utzinger J, Vounatsou P, Hurlimann E, Schur N, Saarnak CFL, et al. Large-  
443 scale determinants of intestinal schistosomiasis and intermediate host snail distribution  
444 across Africa: does climate matter? *Acta Trop*. 2013;128(2):378-90.
- 445 34. Pietroock M, Marcogliese DJ. Free-living endohelminth stages: at the mercy of  
446 environmental conditions. *Trends Parasitol*. 2003;19(7):293-9.
- 447 35. Rohr JR, Raffel TR, Sessions SK, Hudson PJ. Understanding the net effects of pesticides on  
448 amphibian trematode infections. *Ecol Appl*. 2008;18(7):1743-53.
- 449 36. Koprivnikar J, Forbes MR, Baker RL. Effects of atrazine on cercarial longevity, activity,  
450 and infectivity. *J Parasitol*. 2006;92(2):306-11.
- 451 37. Monte TCD, Garcia J, Gentile R, de Vasconcellos MC, Souza J, Braga BV, et al. In vivo  
452 and in vitro effects of the herbicide Roundup (R) on developmental stages of the trematode  
453 *Echinostoma paraensei*. *Exp Parasitol*. 2016;169:43-50.
- 454 38. Hua J, Buss N, Kim J, Orlofske SA, Hoverman JT. Population-specific toxicity of six  
455 insecticides to the trematode *Echinoparyphium* sp. *Parasitology*. 2016;143(5):542-50.

- 456 39. Raffel TR, Sheingold JL, Rohr JR. Lack of Pesticide Toxicity to *Echinostoma trivolvis* Eggs  
457 and Miracidia. *J Parasitol.* 2009;95(6):1548-51.
- 458 40. Reddy A, Ponder EL, Fried B. Effects of copper sulfate toxicity on cercariae and  
459 metacercariae of *Echinostoma caproni* and *Echinostoma trivolvis* and on the survival of  
460 *Biomphalaria glabrata* snails. *J Parasitol.* 2004;90(6):1332-7.
- 461 41. Strober W. Trypan blue exclusion test of cell viability. *Curr Protoc Immunol.*  
462 2001;Appendix 3:Appendix 3B.
- 463 42. McMahon TA, Rohr JR. Trypan blue dye is an effective and inexpensive way to determine  
464 the viability of *Batrachochytrium dendrobatidis* zoospores. *Ecohealth.* 2014;11(2):164-7.
- 465 43. Salvador-Recatala V, Greenberg RM. Calcium channels of schistosomes: unresolved  
466 questions and unexpected answers. *Wiley Interdiscip Rev Membr Transp Signal.*  
467 2012;1(1):85-93.
- 468 44. Bruckner DA, Vage M. The nervous system of larval *Schistosoma mansoni* as revealed by  
469 acetylcholinesterase staining. *J Parasitol.* 1974;60(3):437-46.
- 470 45. Williamson S, Ball A, Pretty J. Trends in pesticide use and drivers for safer pest  
471 management in four African countries. *Crop Protection.* 2008;27(10):1327-34.
- 472 46. Donald CE, Scott RP, Blaustein KL, Halbleib ML, Sarr M, Jepson PC, et al. Silicone  
473 wristbands detect individuals' pesticide exposures in West Africa. *Roy Soc Open Sci.*  
474 2016;3(8).
- 475 47. Aktar MW, Paramasivam M, Sengupta D, Purkait S, Ganguly M, Banerjee S. Impact  
476 assessment of pesticide residues in fish of Ganga river around Kolkata in West Bengal.  
477 *Environmental Monitoring and Assessment.* 2009;157(1-4):97-104.
- 478 48. Kosikowska M, Biziuk M. Review of the determination of pesticide residues in ambient air.  
479 *Trac-Trend Anal Chem.* 2010;29(9):1064-72.
- 480 49. Ntow WJ, Gijzen HJ, Kelderman P, Drechsel P. Farmer perceptions and pesticide use  
481 practices in vegetable production in Ghana. *Pest Management Science.* 2006;62(4):356-65.
- 482 50. Cox DR. Regression Models and Life-Tables. *J R Stat Soc B.* 1972;34(2):187-+.
- 483 51. Team R. RStudio: Integrated development environment for R. Boston, MA URL  
484 <http://www.rstudio.com/>. 2016.
- 485 52. Diop A, Diop YM, Thiare DD, Cazier F, Sarr SO, Kasprowiak A, et al. Monitoring survey  
486 of the use patterns and pesticide residues on vegetables in the Niayes zone, Senegal.  
487 *Chemosphere.* 2016;144:1715-21.
- 488 53. Amoah P, Drechsel P, Abaidoo RC, Ntow WJ. Pesticide and pathogen contamination of  
489 vegetables in Ghana's urban markets. *Arch Environ Con Tox.* 2006;50(1):1-6.
- 490 54. Anderson KA, Seck D, Hobbie KA, Traore AN, McCartney MA, Ndaye A, et al. Passive  
491 sampling devices enable capacity building and characterization of bioavailable pesticide  
492 along the Niger, Senegal and Bani Rivers of Africa. *Philos T R Soc B.* 2014;369(1639).
- 493 55. Ecobichon DJ. Pesticide use in developing countries. *Toxicology.* 2001;160(1-3):27-33.
- 494 56. Ginetsinskaya T. Trematodes; their life-cycles, biology and evolution. Trematodes; their  
495 life-cycles, biology and evolution. 1968.
- 496 57. Krakower CA. Some observations of the effects of physical and chemical agents on the  
497 cercariae of *Schistosoma mansoni*. 1940.
- 498 58. Hara AH, Kaya HK. Toxicity of Selected Organo-Phosphate and Carbamate Pesticides to  
499 Infective Juveniles of the Entomogenous Nematode *Neoaplectana-Carpocapsae* (Rhabditida,  
500 *Steinernematidae*). *Environmental Entomology.* 1983;12(2):496-501.

- 501 59. Gao J, Yang N, Lewis FA, Yau P, Collins JJ, Sweedler JV, et al. A novel rotifer-derived  
502 alkaloid paralyzes schistosome larvae and prevents infection. *bioRxiv*. 2018:426999.  
503 60. Bueding E. Effects of Benzylic Diamines on *Schistosoma Mansoni*. *Biochemical*  
504 *Pharmacology*. 1962;11(1):17-&.  
505 61. Barker LR, Bueding E, Timms AR. Possible Role of Acetylcholine in *Schistosoma*  
506 *Mansoni*. *Brit J Pharm Chemoth*. 1966;26(3):656-&.  
507 62. Combes C, Fournier A, Mone H, Theron A. Behaviors in Trematode Cercariae That  
508 Enhance Parasite Transmission - Patterns and Processes. *Parasitology*. 1994;109:S3-S13.  
509 63. Rumschlag SL, Bessler SM, Rohr JR. Evaluating improvements to exposure estimates from  
510 fate and transport models by incorporating environmental sampling effort and contaminant  
511 use. *Water Research*. 2019.

512  
513

514  
515  
516  
517  
518  
519  
520  
521  
522  
523  
524

***Tables***

**Table 1. Peak estimated environmental concentrations (EEC) for each insecticide.**

We used the USEPA Pesticide in Water Calculator (PWC; version 1.52) to calculate EEC for pond and reservoir surface waters. Following previously described methods (63), we extracted pesticide parameters from the University of Hertfordshire’s Pesticide Properties DataBase (PPDB; <https://sitem.herts.ac.uk/aeru/ppdb/en/>), the Pesticide Action Network (PAN) Pesticide Database (<http://www.pesticideinfo.org/>), and the Hazardous Substances Data Bank (HSDB; <https://toxnet.nlm.nih.gov/cgi-bin/sis/htmlgen?HSDB>). We then selected the maximum EEC value generated by the PWC calculator.

| <b>Pesticides</b> | <b>Crop</b> | <b>Water body</b> | <b>Peak EEC<br/>(ppb; ug/L)</b> |
|-------------------|-------------|-------------------|---------------------------------|
| Methamidophos     | Potato      | Pond              | 6.05                            |
|                   |             | Reservoir         | 13.9                            |
| Dimethoate        | Corn        | Pond              | 8.17                            |
|                   |             | Reservoir         | 19.2                            |
| Cypermethrin      | Cotton      | Pond              | 0.859                           |
|                   |             | Reservoir         | 2.03                            |
| Deltamethrin      | Corn        | Pond              | 0.0036                          |
|                   |             | Reservoir         | 0.0086                          |

525

526

**Figure Captions**

527 **Fig 1. Survival of *S. mansoni* cercariae following exposure to one of six methamidophos**  
528 **concentrations.** Cercariae were exposed to 0, 100, 200, 300, 400, or 500 mg/L methamidophos  
529 for 24 hr using a time-to-death assay. The pooled control treatment represents the combined  
530 survival of cercariae in the water and vehicle control treatments ( $p = 0.94$ ).  
531

532 **Fig 2. Mean cercarial activity (%) of *S. mansoni* following exposure to one of six**  
533 **methamidophos concentrations.** We recorded the number of cercariae active over 24 hrs  
534 following exposure to 0, 100, 200, 300, 400, or 500 mg/L methamidophos. We calculated  
535 cercarial activity (%) by dividing the number of trematodes observed moving by the total number  
536 of individuals in the well. We observed the main effect of methamidophos concentration (A) and  
537 time (B) on cercarial activity. Data points represents overall treatment mean values  $\pm 1$  SE.  
538

539 Fig 1.

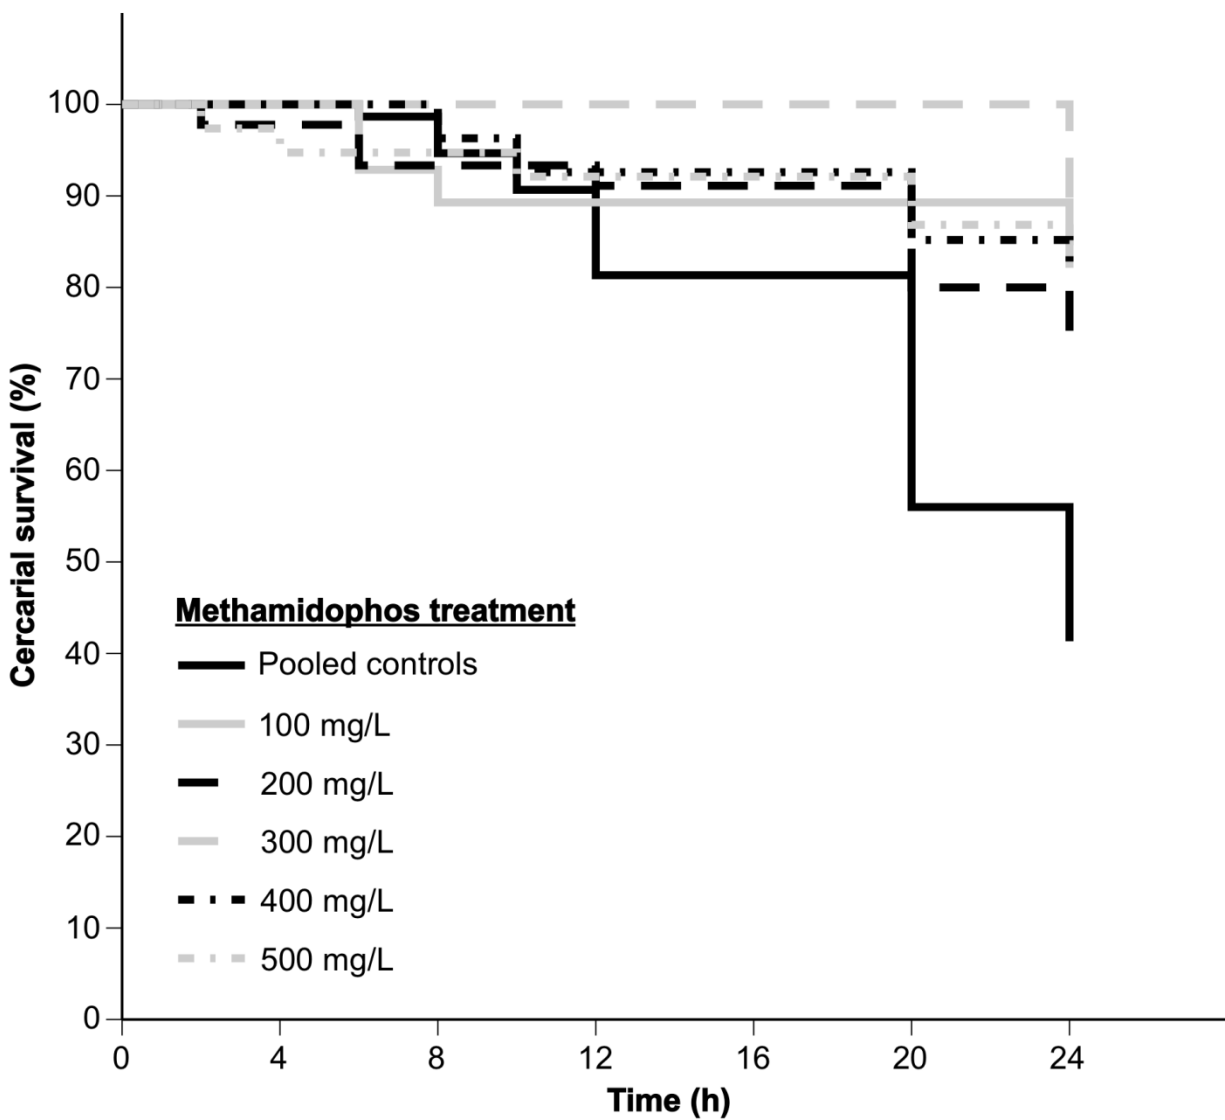

540

541



542 **Fig 2.**

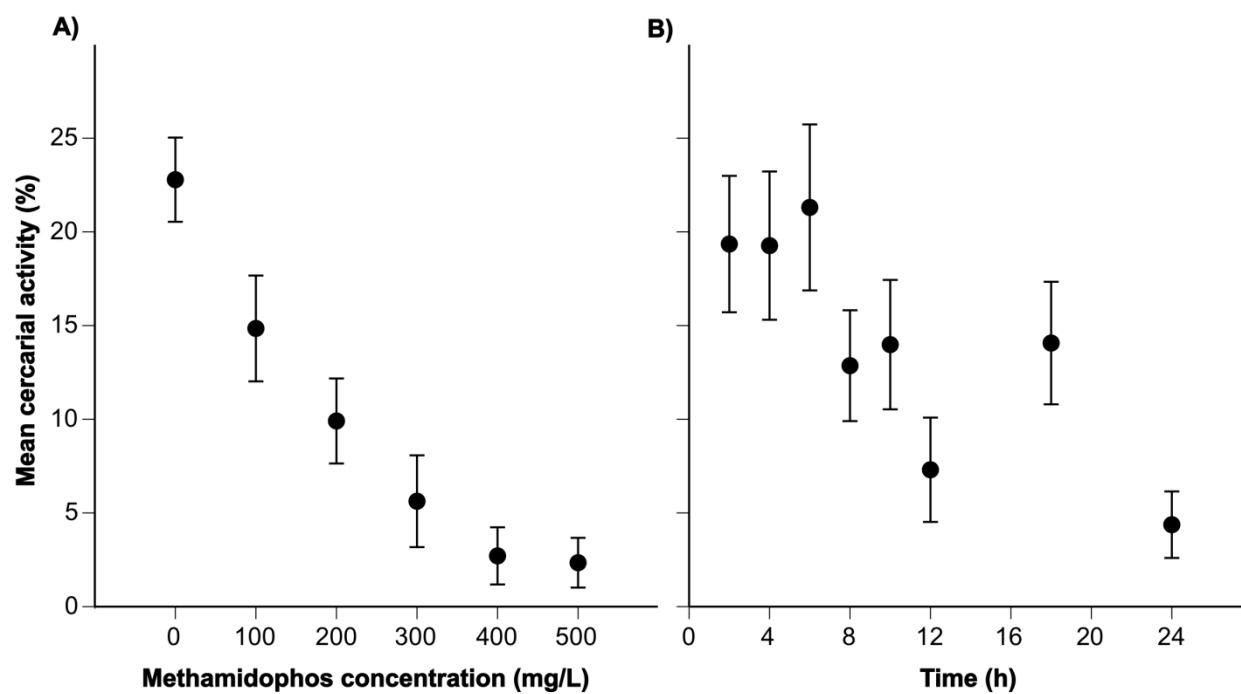

543

544

## Supporting Information

545 *Supporting Tables*

546 **S1 Table. Results of Cox's proportional hazard models examining survival of *S. mansoni***  
547 **cercariae following exposure to five concentrations of four commonly used insecticides in**  
548 **Africa.** We first compared survival in control treatments before using a pooled control survival  
549 in each subsequent analyses. We then determined the effect of concentration of each pesticide.  
550 For pesticides with a significant concentration effect, we then compared cercarial survival in  
551 each concentration to that in the pooled control treatments. Each model included experimental  
552 well as a random effect. Hazard regression coefficient (*b*) and *p*-values are reported.

553

554 **Control treatment survival**

|                            | <i>b</i> | p-value |
|----------------------------|----------|---------|
| Water control <sup>a</sup> | -        | -       |
| Ethanol vehicle control    | -0.023   | 0.94    |

555 <sup>a</sup>Each treatment was compared to the first in each model.

556

557 **Effect of concentration\* on survival**

|                     | <i>b</i> | p-value      |
|---------------------|----------|--------------|
| Methamidophos conc. | -0.003   | <b>0.002</b> |
| Dimethoate conc.    | < 0.001  | 0.8          |
| Cypermethrin conc.  | < 0.001  | 0.98         |
| Deltamethrin conc.  | 0.001    | 0.64         |

558 \* Pooled control survival was used as a 0.0 mg/L pesticide concentration in each model

559

560 **Effect of concentration within pesticide treatment on survival**

|                             | <i>b</i> | p-value      |
|-----------------------------|----------|--------------|
| <i>Methamidophos</i>        |          |              |
| Pooled control <sup>a</sup> | -        | -            |
| 100 mg/L                    | -1.404   | <b>0.013</b> |
| 200 mg/L                    | -1.063   | <b>0.031</b> |
| 300 mg/L                    | -1.722   | <b>0.028</b> |
| 400 mg/L                    | -1.434   | <b>0.012</b> |
| 500 mg/L                    | -1.013   | 0.120        |

561 <sup>a</sup>Each pesticide concentration was compared to the first treatment in the model.

562

563 *Supporting Figures*

564

565 **S1 Fig. Distinguishing dead cercariae from paralyzed cercariae.**

566 When using HHCOMBO water alone (A), observers are unable to identify dead from paralyzed

567 cercariae. We used Trypan blue staining dye (B), which stains dead tissue but is excreted by live

568 cercariae, to ascertain true death from pesticide-induced paralysis.

569

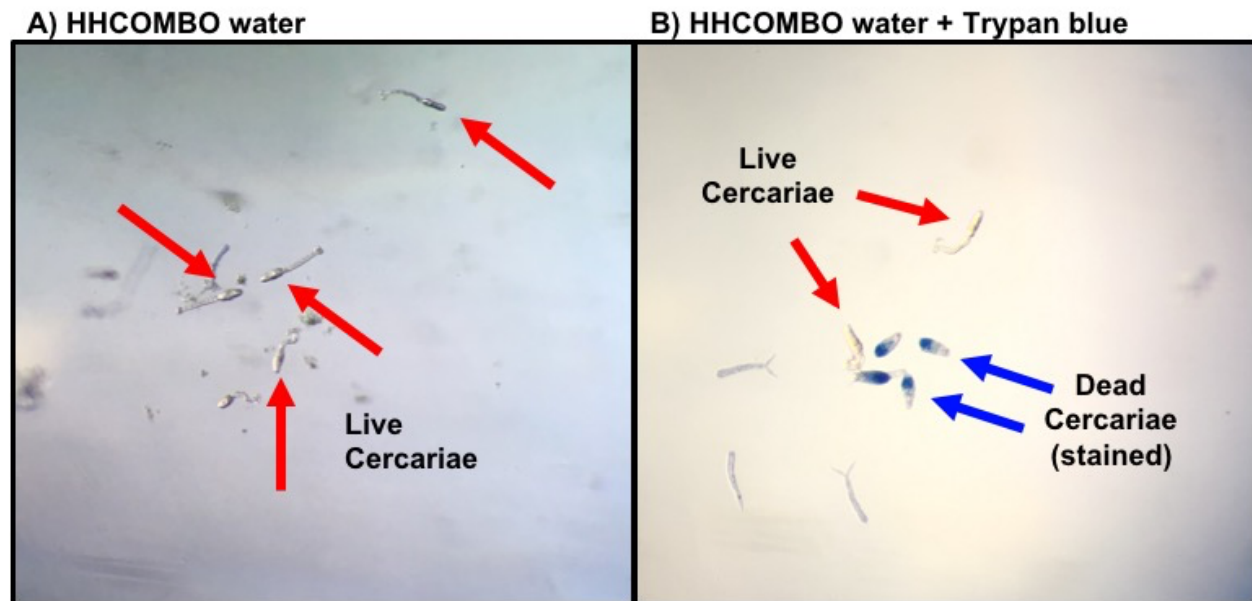

570 *Supporting Datasets*

571

572 **S1 Dataset. Survival data for the 24-hr time-to-death assay.**

573 We exposed *Schistosoma mansoni* cercariae to five concentrations of four insecticides and  
574 assessed time-to-death over a 24-hr period. The “S1 Dataset\_Data\_Survival\_JonesEtAl.csv”  
575 includes survival data for all cercariae in the corresponding study. The values for the column  
576 ‘Event’ correspond to mortality events; 0 = surviving, 1 = mortality event.

577

578 **S2 Dataset. Activity data for the 24-hr time-to-death assay.**

579 We exposed *Schistosoma mansoni* cercariae to five concentrations of four insecticides and  
580 assessed activity over a 24-hr period. The “S2 Dataset\_Data\_Activity\_JonesEtAl.csv” includes  
581 cercarial activity data for the corresponding study.

582
